# Supplementary material for: Comparison of the effects of two laser photobiomodulation techniques on bio-physical properties of Zea mays L. seeds
Source: PeerJ. 2021 Jan 15;9:e10614. doi: 10.7717/peerj.10614 (PMC7812920; doi:10.7717/peerj.10614)
Supplement: Supplemental Information 1 [file peerj-09-10614-s001.xlsx]

## Sheet: Sheet1
Treatments			Abbreviation	Replication	Parameters
					Emergence %	Emergence index	Speed emergence	Mean emergence time	Vigour index	Seedling length	Leaves number	Fresh weight	Dry weight	Stem diameter	Days to Anthesis	Days to Silking	Protein content	Oil content	Starch content
Green Laser	45 s	4 mW/cm2	T1S1	R1	80.0667	4.90667	33.1842	42.8091	222.82	21.89	7.5	2.15	0.84	2.4	61.5	60.3	15.6	5.8	65.31
			T1S2	R2	78.9667	5.83667	34.5842	44.2091	224.92	17.64	7	1.12	1.14	1.8	60.5	61.8	14.5	6.71	67.53
			T1S3	R3	78.4667	6.25667	36.2842	44.7091	225.46	21.67	7.1	4.68	0.36	2.1	59.2	62.4	14.99	5.55	65.16
		2 mW/cm2	T1S2	R1	87.3	6.78333	41.1238	49.3015	281.29	22.5	7.7	1.074	0.18	3.4	60.8	63.7	15.74	5.2	65.1
			T1S3	R2	87	5.97333	40.9238	47.9715	280.73	23	7.6	2.174	0.718	3.9	58.2	62.5	16.38	4.5	65.86
			T1S4	R3	88.2	6.24333	39.5238	51.4615	280.38	19.3	8.1	3.574	0.718	2.9	58.96	65.5	16.03	4.61	65.48
	65 s	4 mW/cm2	T2S1	R1	88.1	5.8	30.1857	43.8233	219	23.3	7.5	5.102	1.314	2.1	58.1	64.3	15.63	6.31	67.33
			T2S1	R2	86.89	6.11	28.7857	44.4433	217.6	24.6	8.6	2.402	0.614	2.7	57.4	61.5	13.46	5.94	66.97
			T2S1	R3	88.51	6.09	28.8857	44.7333	216.8	24.7	8.5	4.802	0.214	2.7	59.4	64.1	13.84	5.48	69.22
		2 mW/cm2	T2S2	R1	82.5333	6.20667	51.8	53.4359	343.38	20.75	8	1.716	0.344	2.6	63.5	60.5	16.94	5.41	68.17
			T2S2	R2	84.8333	6.63667	51.2	55.1359	342.21	20.03	7.5	2.516	0.844	2	62.4	62.8	15.24	5.97	68.55
			T2S2	R3	82.6333	6.40667	51.8	55.5459	344.61	19.82	7.3	4.216	0.444	2	61	64.8	16.99	5.51	68.3
	85 s	4 mW/cm2	T3S1	R1	73.6	5.92333	31.5778	38	192.99	19.28	8.4	4.938	0.648	1.7	61.3	63.46	16.14	6.31	73.9
			T3S1	R2	77.2	5.11333	32.2778	38.6	194.59	21.38	7.6	1.938	0.048	1.6	60.85	61.52	17.74	6.81	72.65
			T3S1	R3	74.2	4.96333	31.4778	40.4	194.42	18.54	8	1.788	0.948	1.2	60.07	61.77	17.78	5.42	73.41
		2 mW/cm2	T3S2	R1	78.7667	5.71	45.4421	50.6667	213.6	23.3	7.8	1.952	0.276	2.1	62.4	63.4	16.7	4.51	68.34
			T3S2	R2	79.5467	5.28	45.8421	51.4467	214.2	22.87	7.3	1.352	0.576	2.6	61.8	64.5	18.1	5.61	69.78
			T3S2	R3	79.1867	7.01	46.2421	48.0867	214.2	24.03	7.1	4.052	0.576	2.8	60	64.1	17.25	4.52	67.98
	105 s	4 mW/cm2	T4S1	R1	74.9	4.88333	23.3444	39.1857	124.28	18.3	6.8	1.872	0.378	2.2	57.9	63.3	17.85	3.5	69.57
			T4S1	R2	75.2	5.40333	22.2444	38.3857	123.01	17.03	6.7	3.072	0.678	2.8	58.1	64	16.5	3.1	71.2
			T4S1	R3	74.9	4.96333	24.7444	37.2857	122.31	17.47	7.5	3.372	0.378	2.8	56.2	65	18.27	4.68	71.09
		2 mW/cm2	T4S2	R1	91.4667	4.54333	31.2333	36.33	351.6	22.76	7.7	2.058	0.472	2.8	61.5	64.1	16.3	4.26	64.47
			T4S2	R2	91.1667	4.75333	31.1333	37.03	351.88	21.68	8.1	3.058	0.372	2.9	62.1	63.5	14.8	4.91	63.9
			T4S2	R3	92.3667	4.45333	31.6333	37.64	349.52	19.76	7.6	2.858	0.722	3	62.22	68.6	14.86	3.64	65.19
Red Laser	45 s	4 mW/cm2	T1S1	R1	62.5	5.57333	47.3	51.9	353.62	23.69	8.1	1.562	0.792	2.4	59.4	61.5	15.8	6.2	65.22
			T1S1	R2	62	6.50333	48.7	53.3	355.72	19.44	7.6	0.532	1.092	2.1	60.43	62.4	13.7	5.7	64.97
			T1S1	R3	63	6.92333	50.4	53.8	356.26	23.47	7.7	4.092	0.56	3.6	56.87	60.6	13.16	5.62	66.73
		2 mW/cm2	T1S2	R1	83.9333	7.61667	60.9636	62.24	272.49	14.5	6.7	1.532	0.55	2.8	62.5	64.5	13.7	6.7	68.46
			T1S2	R2	82.7233	6.80667	60.7636	60.91	271.93	15	6.6	2.632	0.8	1.9	61.4	62.8	15.4	6.2	67.49
			T1S2	R3	84.3433	7.07667	59.3636	64.4	271.58	11.3	7.1	4.032	0.8	1.9	60	64.4	15.3	4.83	68.95
	65 s	4 mW/cm2	T2S1	R1	70.0333	5.88333	41.3	47.6438	227.4	16.5	6.7	3.888	1.12	2.2	59.7	62.4	15	4.83	62.52
			T2S1	R2	72.3333	6.19333	39.9	48.2638	226	17.8	7.8	1.188	0.42	2.9	62.4	63.5	16.4	4.1	63.79
			T2S1	R3	70.1333	6.17333	40	48.5538	225.2	17.9	7.7	3.588	0.02	3.3	60	64	17.2	3.94	63.29
		2 mW/cm2	T2S2	R1	86.1	5.20667	42.9059	44.5871	293.98	21.55	8.8	1.454	0.328	2.6	61.2	60.9	14.63	3.24	67.16
			T2S2	R2	89.7	5.63667	42.3059	46.2871	292.81	18.8	8.3	2.254	0.828	2.1	60.4	62.4	15.8	3.67	68.8
			T2S2	R3	86.7	5.40667	42.9059	46.6971	295.21	19.9	8.1	3.954	0.428	2.5	58.7	64.8	13.4	3.08	66.12
	85 s	4 mW/cm2	T3S1	R1	78.7667	7.25667	51.5619	56.0112	335.59	17.7	8.6	4.594	0.624	1.9	57.6	62.6	16.4	4.51	71.61
			T3S1	R2	79.5467	6.44667	52.2619	54.2412	337.19	21.78	7.8	1.594	0.024	2.5	60.6	62.9	14.8	4.97	70.8
			T3S1	R3	79.1867	6.29667	51.4619	57.5712	337.02	18.94	8.2	1.444	0.924	1.6	60.75	61.25	14.97	4.62	67.74
		2 mW/cm2	T3S2	R1	87.4	6.38333	39.8632	47.4462	252.8	19.3	8.2	2.074	0.23	2.3	61.9	65.4	15.62	4.61	69.4
			T3S2	R2	87.7	6.90333	40.2632	48.2262	253.08	18.87	7.7	1.474	0.53	2	62.5	63.4	15.34	5.31	70.5
			T3S2	R3	87.4	6.46333	40.6632	44.8662	250.72	20.03	7.5	4.174	0.53	2	59.8	63.2	17.7	5.11	68.9
	105 s	4 mW/cm2	T4S1	R1	75	5.54333	48.8524	55.15	346.68	22.3	8.2	2.046	0.444	2.4	62.4	65.3	15.43	6.84	65.4
			T4S1	R2	76.1	5.11333	47.7524	54.35	345.41	21.03	8.1	3.246	0.744	2.1	61.2	63.7	16.7	6.54	66.1
			T4S1	R3	73.9	6.84333	50.2524	53.25	344.71	21.47	8.9	3.546	0.444	2.4	60.9	63.3	17.4	5.61	65.99
		2 mW/cm2	T4S2	R1	63.6	5.87667	51.1222	51.5653	261.4	16.76	7.1	0.77	0.372	2.2	63.4	66.9	15.1	6.3	67.52
			T4S2	R2	61.9	6.08667	51.0222	52.2653	262	15.68	7.5	1.77	0.272	2.3	62.4	65.1	14.5	6.05	66.9
			T4S2	R3	62	5.78667	51.5222	52.8753	262	13.76	7	1.57	0.622	1.95	62.6	64.2	14.5	5.47	69.1
Control			Control	R1	63.6	4.45333	35.9333	43	189.1	18.8	7	3.338	0.66	2.7	62.4	62.4	16.8	4.58	70.51
			Control	R2	61.9	3.95333	39.6233	47.6	187.4	19.9	6.7	3.938	0.36	3	61.8	63.8	15.7	4.15	70.89
			Control	R3	62	5.34333	40.2333	45.4	187.5	17.7	6.7	2.438	0.36	3	60	62.8	17.9	4.38	68.96
